# Supplementary material for: Safety and efficacy of abexinostat, a pan-histone deacetylase inhibitor, in non-Hodgkin lymphoma and chronic lymphocytic leukemia: results of a phase II study
Source: PubMed Central journal article supplement — Haematologica. 2017 May;102(5):903–9. doi: 10.3324/haematol.2016.154377 (PMC5477609; doi:10.3324/haematol.2016.154377), 2017-05
Supplement: 2016.154377.RIBRAG_SUPPL.pdf [file 2016.154377.RIBRAG_SUPPL.pdf]

## Safety and efficacy of abexinostat, a pan-histone deacetylase inhibitor, in non-Hodgkin lymphoma and chronic lymphocytic leukemia: results of a phase II study

Vincent Ribrag,<sup>1</sup> Won Seog Kim,<sup>2</sup> Reda Bouabdallah,<sup>3</sup> Soon Thye Lim,<sup>4</sup> Bertrand Coiffier,<sup>5</sup> Arpad Illes,<sup>6</sup> Bernard Lemieux,<sup>7</sup> Martin J. S. Dyer,<sup>8</sup> Fritz Offner,<sup>9</sup> Zakia Felloussi,<sup>10</sup> Ioana Kloos,<sup>10</sup> Ying Luan,<sup>11</sup> Remus Vezan,<sup>11</sup> Thorsten Graef,<sup>11</sup> and Franck Morschhauser<sup>12</sup>

<sup>1</sup>Institut de Cancérologie Gustave Roussy, Villejuif, France; <sup>2</sup>Samsung Medical Center, Sungkyunkwan University School of Medicine, Seoul, Korea; <sup>3</sup>CLCC Institut Paoli Calmettes, Marseille, France; <sup>4</sup>National Cancer Center Singapore, Duke-National University of Singapore Medical School, Singapore; <sup>5</sup>Hospices Civils de Lyon, France; <sup>6</sup>Department of Hematology, Faculty of Medicine, University of Debrecen Medical and Health Science Center, Hungary; <sup>7</sup>CHUM, Montreal, QC, Canada; <sup>8</sup>Ernest and Helen Scott Haematological Research Institute, University of Leicester, UK; <sup>9</sup>Universitair Ziekenhuis Gent, Gent, Belgium; <sup>10</sup>Servier, Paris, France; <sup>11</sup>Pharmacyclics LLC, an AbbVie Company, Sunnyvale, CA, USA and <sup>12</sup>Department of Hematology, Université de Lille, EA GRIIOT, France

©2017 Ferrata Storti Foundation. This is an open-access paper. doi:10.3324/haematol.2016.154377

Received: August 22, 2016.

Accepted: January 13, 2017.

Pre-published: January 25, 2017.

Correspondence: vincent.ribrag@gustaveroussy.fr

---

## **Supplemental Appendix**

Supplement to: Ribrag V, Kim WS, Bouabdallah R, et al. Safety and efficacy of abexinostat, a pan-histone deacetylase inhibitor, in non-Hodgkin lymphoma and chronic lymphocytic leukemia: Results of an ongoing phase 2 study

### **Table of Contents**

**Supplementary Table 1.** Gastrointestinal and hematologic toxicities leading to dose reductions and treatment discontinuations

**Supplementary Figure 1.** Progression-free survival in different tumor types

**Supplementary Table 1.** Gastrointestinal and hematologic toxicities leading to dose reductions and treatment discontinuations

|                                                      | Gastrointestinal Toxicities |              |                | Hematologic Toxicities |               |                 |
|------------------------------------------------------|-----------------------------|--------------|----------------|------------------------|---------------|-----------------|
|                                                      | Diarrhea                    | Nausea       | Vomiting       | Thrombocytopenia       | Neutropenia   | Anemia          |
| Incidence of any related grade (grade 3/4) events, % | 42 (3)                      | 33 (2)       | 17 (0)         | 87 (80)                | 34 (27)       | 20 (12)         |
| Led to dose reduction, %                             | 0                           | 0            | 0              | 17                     | 1             | 0               |
| Led to treatment discontinuation, %                  | 1                           | 0            | 1              | 12                     | 3             | 2               |
| Median time to onset of first event, days (range)    | 8<br>(1–233)                | 6<br>(1–130) | 7.5<br>(1–233) | 14<br>(4–100)          | 36<br>(4–288) | 32.5<br>(1–511) |

### Supplementary Figure 1: Progression-free survival in different tumor types

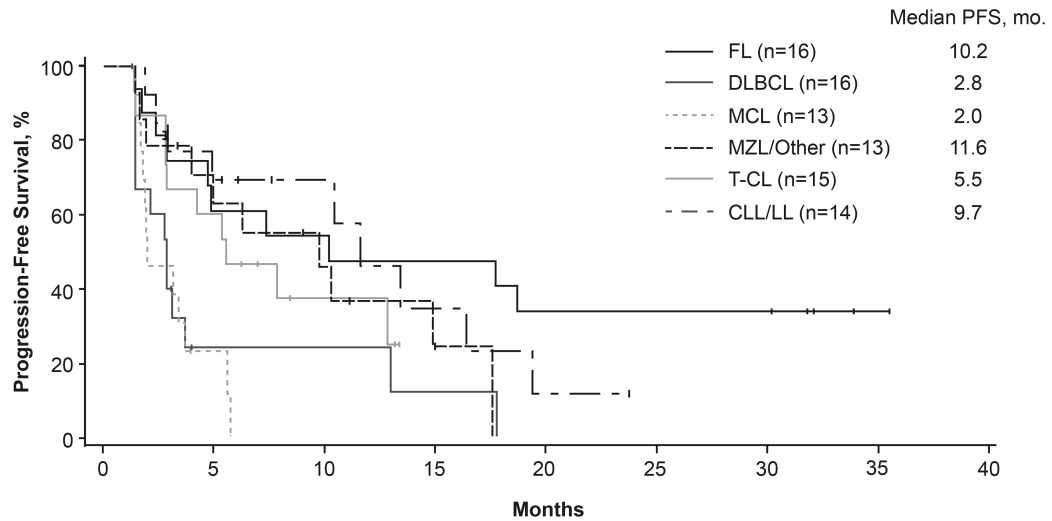

| Patients at Risk |    | 0 | 5 | 10 | 15 | 20 | 25 | 30 | 35 | 40 |
|------------------|----|---|---|----|----|----|----|----|----|----|
| FL               | 16 | 9 | 8 | 7  | 5  | 5  | 5  | 1  | 0  |    |
| DLBCL            | 16 | 2 | 2 | 1  | 0  |    |    |    |    |    |
| MCL              | 13 | 2 | 0 |    |    |    |    |    |    |    |
| MZL/Other        | 13 | 9 | 6 | 3  | 1  | 1  | 0  |    |    |    |
| T-CL             | 15 | 9 | 3 | 0  |    |    |    |    |    |    |
| CLL/LL           | 14 | 8 | 5 | 1  | 0  |    |    |    |    |    |

Abbreviations: CLL, chronic lymphocytic leukemia; DLBCL, diffuse large B-cell lymphoma; FL, follicular lymphoma; LL, lymphoblastic lymphoma; MCL, mantle cell lymphoma; MZL, marginal zone lymphoma; PFS, progression-free survival; T-CL, T-cell lymphoma.
