# Supplementary material for: Safety and efficacy of abexinostat, a pan-histone deacetylase inhibitor, in non-Hodgkin lymphoma and chronic lymphocytic leukemia: results of a phase II study
Source: PubMed Central journal article supplement — Haematologica. 2017 May;102(5):903–9. doi: 10.3324/haematol.2016.154377 (PMC5477609; doi:10.3324/haematol.2016.154377), 2017-05
Supplement: HAEMATOL-2016-154377v3-Ribrag_01-01-01.pdf [file HAEMATOL-2016-154377v3-Ribrag_01-01-01.pdf]

# Results of a phase 2 study for safety and efficacy of abexinostat, a pan-histone deacetylase inhibitor, in non-Hodgkin lymphoma and chronic lymphocytic leukemia

Phase 2 study between Oct 2011 and Jul 2014

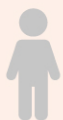

84

Relapsed/refractory non-Hodgkin lymphoma

16

Chronic lymphocytic leukemia

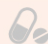

oral **abexinostat** at 80 mg BID

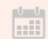

14 days of a 21-day cycle

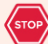

progressive disease or unacceptable toxicity

## Safety

2.8

months was the **median duration of treatment** (range, 0.7–35.4 months)

Most common primary reasons for withdrawal from the study

- progressive disease (56%)
- adverse events (25%)

98%

of patients showed treatment-emergent **adverse events** related to study drug

82% of patients experienced grade  $\geq 3$  events

- thrombocytopenia (80%)
- neutropenia (27%)
- anemia (12%)

## Efficacy

28%

was the **overall response rate** was for the 87 patients evaluable for efficacy at a median follow-up of 18 months

5% with complete response
